# Supplementary material
Source: PubMed Central journal article supplement (PMC5995464)
Supplement: NIHMS969462-supplement-2.pdf [file NIHMS969462-supplement-2.pdf]

# Supplemental Figure 1

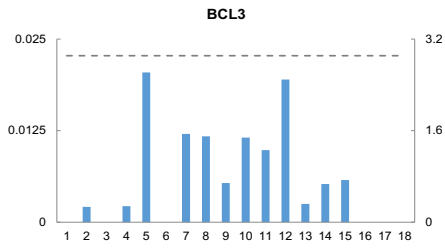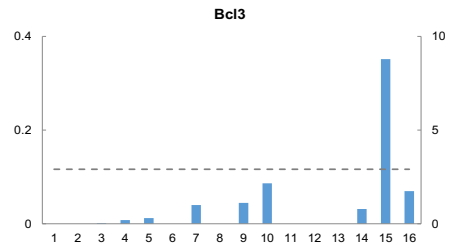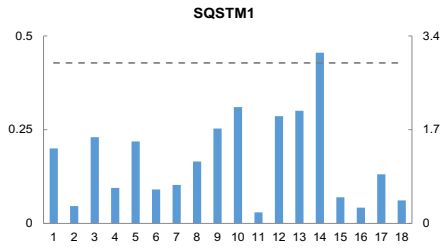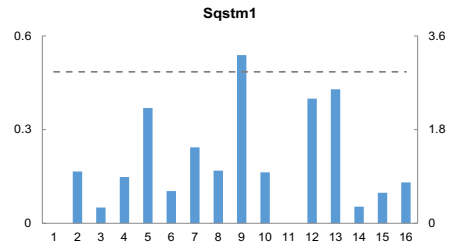

**Supplemental Figure 1. The gene expression profiles of BCL3 and SQSTM1 in human and mouse tissues**

The expression profiles of previously identified macrophage "brake" molecules including BCL3 and SQSTM1 in human (Left column, in capital letters) and mouse (right column, designated with lowercase letters) tissues.

# Supplemental Figure 2

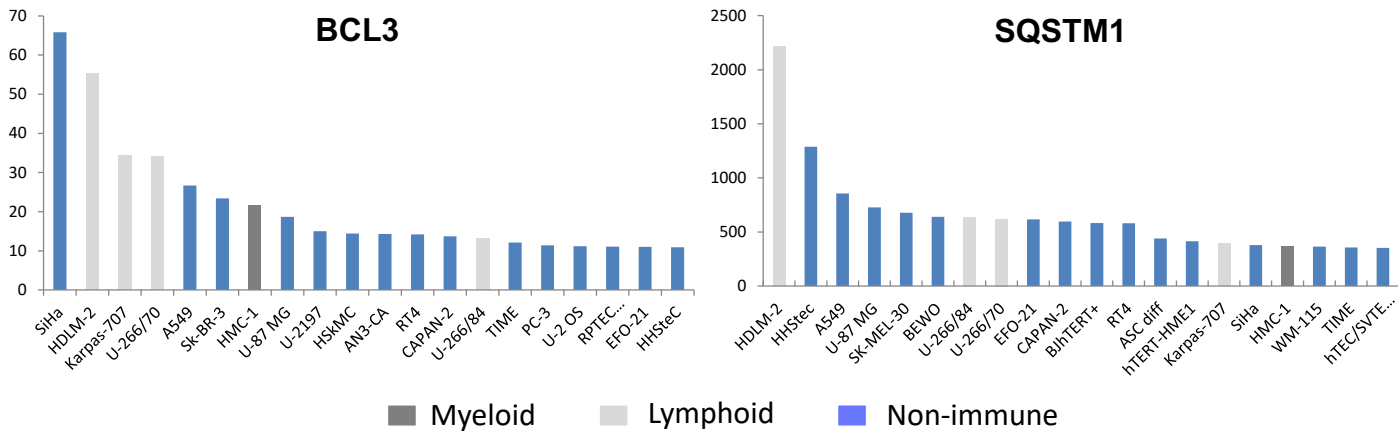

## Supplemental Figure 2. The gene expression profiles of BCL3 and SQSTM1 in human cells.

Transcription abundance of BCL3 and SQSTM1 are examined in the Human Protein Atlas project. The analyzed cell lines are divided into 3 color-coded groups according to the organ they were obtained from. The RNA-sequencing results generated are reported as number of Transcripts per Kilobase Million (TPM). Top 20 most expressed out of 56 cell lines examined are shown.

# Supplemental Figure 3

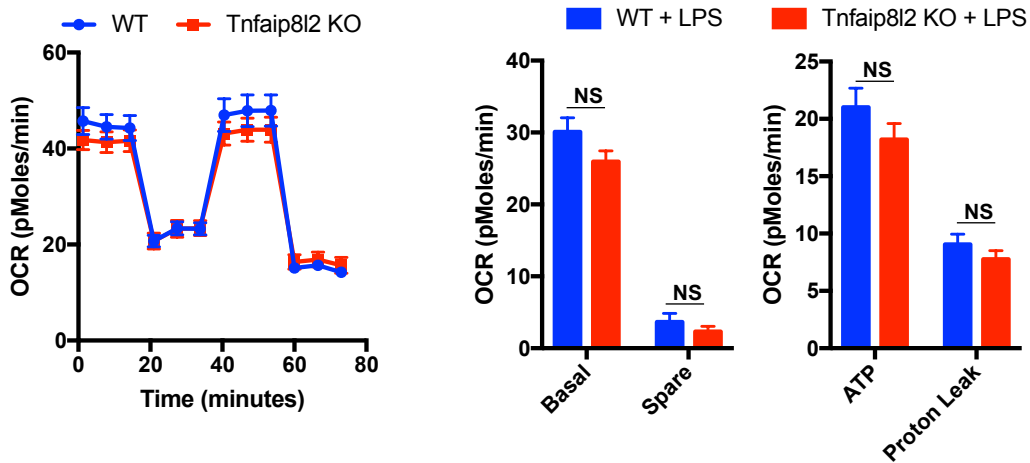

**Figure 5. TNFAIP8L2 does not regulate mitochondrial respiration during long-term lipopolysaccharide (LPS) challenge.** Bone marrow-derived macrophages (BMDMs) from either wild type (WT) mice or *Tnfaip8l2* gene knockout mice were challenged with LPS (100 ng/mL) for 18 hours. Mitochondrial oxygen consumption rate (OCR) was measured using Seahorse XF96 analyzer. XF Mito Stress Test was performed by sequential adding of Oligomycin (2  $\mu$ M), FCCP (2  $\mu$ M), and Rotenone (1  $\mu$ M). Experiment plot (left) and quantification of four mitochondrial parameters (right) were shown (n=10 to 11 in each group). For all panels, data are expressed as mean  $\pm$  SEM. NS, not significant.

**Supplemental Table 1. BCL3 and SQSTM1 are differentially expressed in human and mouse tissues. The colored values indicate high expression levels with statistical significance among all tissues.**

| Human          | BCL3 | SQSTM1      | Mouse          | Bcl3        | Sqstm1      |
|----------------|------|-------------|----------------|-------------|-------------|
| adipose tissue | -    | 1.35        | adipose tissue | -           | -           |
| blood          | 0.27 | 0.31        | blood          | -           | 1.01        |
| bone marrow    | -    | 1.55        | bone marrow    | 0.03        | 0.31        |
| brain          | 0.28 | 0.64        | brain          | 0.20        | 0.90        |
| eye            | 2.62 | 1.48        | eye            | 0.31        | 2.24        |
| heart          | -    | 0.61        | heart          | -           | 0.63        |
| intestine      | 1.55 | 0.70        | intestine      | 1.00        | 1.48        |
| kidney         | 1.50 | 1.12        | kidney         | -           | 1.03        |
| liver          | 0.69 | 1.71        | liver          | 1.12        | <b>3.27</b> |
| lung           | 1.48 | 2.10        | lung           | 2.16        | 0.99        |
| lymph node     | 1.26 | 0.20        | lymph node     | -           | -           |
| pancreas       | 2.50 | 1.93        | pancreas       | -           | 2.42        |
| placenta       | 0.32 | 2.03        | spinal cord    | -           | 2.61        |
| skin           | 0.67 | <b>3.07</b> | skin           | 0.79        | 0.32        |
| spleen         | 0.74 | 0.47        | spleen         | <b>8.80</b> | 0.59        |
| thymus         | -    | 0.28        | thymus         | 1.75        | 0.80        |
| trachea        | -    | 0.88        |                |             |             |
| vascular       | -    | 0.42        |                |             |             |

**Supplemental Table 2. BCL3 and SQSTM1 are upregulated in macrophages after lipopolysaccharide (LPS) stimulation. Gene expression was examined in two published microarrays that examined the response of macrophage to LPS challenge.**

| Study PMID | Cell type  | Treatment | Time | Bcl3 | Sqstm1 | $\beta$ -Actin |
|------------|------------|-----------|------|------|--------|----------------|
| 24337578   | macrophage | LPS       | 24h  | 1.98 | 2.47   | 1.1            |
| 25252959   | macrophage | LPS       | 5h   | 1.43 | 1.11   | 1.25           |
